# Supplementary material for: Assessment of Nanopollution from Commercial Products in Water Environments
Source: MDPI journal article supplement (doi:10.3390/nano11102537), 2021-09-28
Supplement: s1 [file s1]

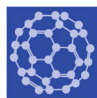

Supplementary

# Assessment of Nanopollution in Water Environments from Commercial Products

Raisibe Florence Lehutso <sup>1,2</sup> and Melusi Thwala <sup>1,3,4,\*</sup>

<sup>1</sup> Water Centre, Council for Scientific and Industrial Research, Pretoria, 0001, South Africa; flehutso@csir.co.za

<sup>2</sup> Department of Chemical Sciences, University of Johannesburg, Johannesburg, 2028, South Africa

<sup>3</sup> Department of Environmental Health, Nelson Mandela University, Gqeberha, 6019, South Africa

<sup>4</sup> Centre for Environmental Management, University of the Free State, Bloemfontein, 9031, South Africa

\* Correspondence: mthwala@csir.co.za

## Properties of the release media of SUN1–3

For artificial freshwater, commercial Valpré spring water, sourced from the Fricona Valley in the highlands of northern KwaZulu-Natal, South Africa, was purchased from a local store (Clicks, South Africa). The mineral composition of Valpré Spring water was [Calcium = 10 mg/L, Magnesium = 10 mg/L, Sodium = 3 mg/L, Potassium = 1 mg/L, Chloride = 2 mg/L, Sulphate = 4 mg/L, alkalinity (as CaCO<sub>3</sub>) = 65 mg/L, Nitrate = 1 mg/L, Fluoride = 0.1 mg/L, and total dissolved solid = 83 mg/L. Artificial seawater was prepared from commercial Red sea salt (Jungle Aquatics, South Africa); the solution was prepared for parameters of 35 ppt [1]. Artificial swimming pool water was prepared in Milli-Q water (MQ) and was made up of CaSO<sub>4</sub>·2H<sub>2</sub>O, NaHCO<sub>3</sub> (both purchased from Merck, South Africa) and NaClO (3.5%) (Clicks, South Africa) were prepared following a previously reported procedure [2,3].

**Table S1.** Average physicochemical properties of release media before and after ENMs release.

| Before release            |                 |                                          |                 |
|---------------------------|-----------------|------------------------------------------|-----------------|
|                           | pH              | Conductivity ( $\mu\text{S}/\text{cm}$ ) | Turbidity (NTU) |
| Milli-Q water             | $8.61 \pm 0.04$ | $1.71 \pm 0.03$                          | $0.24 \pm 0.01$ |
| Freshwater                | $7.70 \pm 0.09$ | $148.5 \pm 0.08$                         | $0.19 \pm 0.02$ |
| Seawater                  | $5.08 \pm 0.01$ | $41400 \pm 100$                          | $1.90 \pm 0.01$ |
| Swimming pool water       | $5.78 \pm 0.08$ | $5139 \pm 89$                            | $237 \pm 7$     |
| After release             |                 |                                          |                 |
| Milli-Q water–SUN1        | $8.56 \pm 0.4$  | $112.3 \pm 5$                            | $5.67 \pm 0.4$  |
| Freshwater –SUN1          | $7.53 \pm 0.09$ | $249 \pm 4$                              | $5.98 \pm 0.9$  |
| Seawater –SUN1            | $6.78 \pm 0.1$  | $64.9 \pm 1$                             | $5.61 \pm 0.3$  |
| Swimming pool water –SUN1 | $6.71 \pm 0.09$ | $7.02 \pm 2$                             | $3.52 \pm 0.1$  |
| Milli-Q water –SUN2       | $8.59 \pm 0.17$ | $237 \pm 7$                              | $20.4 \pm 2$    |
| Freshwater –SUN2          | $7.58 \pm 0.13$ | $277.0 \pm 5$                            | $61.9 \pm 2$    |
| Seawater –SUN2            | $6.69 \pm 0.09$ | $64 \pm 3$                               | $89.8 \pm 1$    |
| Swimming pool water –SUN2 | $7.24 \pm 0.1$  | $6.88 \pm 1$                             | $58.2 \pm 2$    |
| Milli-Q water –SUN3       | $8.26 \pm 0.05$ | $185.2 \pm 3$                            | $66.8 \pm 3$    |
| Freshwater –SUN3          | $7.73 \pm 0.1$  | $288 \pm 4$                              | $74.9 \pm 5$    |
| Seawater –SUN3            | $6.84 \pm 0.07$ | $62.4 \pm 1$                             | $48.1 \pm 1$    |
| Swimming pool water –SUN3 | $7.40 \pm 0.12$ | $7.00 \pm 1$                             | $71.1 \pm 2$    |
| Milli-Q water –CA1        | $7.23 \pm 0.15$ | $9.95 \pm 2$                             | $80.8 \pm 1$    |
| Milli-Q water –SAN1       | $8.43 \pm 0.09$ | $3.83 \pm 0.1$                           | $0.42 \pm 0.02$ |
| Milli-Q water –SK1        | $7.71 \pm 0.12$ | $81.0 \pm 1$                             | $40.2 \pm 2$    |

Physicochemical properties in SUN1–3 and CA1 release media under light and dark conditions were not significant.

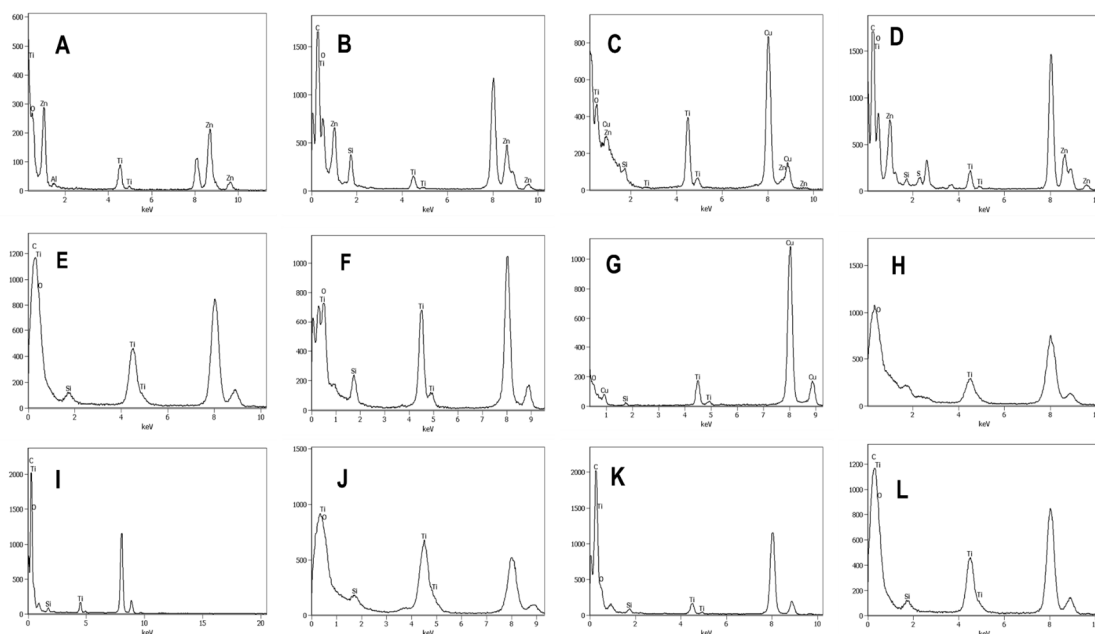

**Figure S1.** The EDX spectra of product released-ENMs obtained under light conditions for SUN1 detected in milli-Q water (A), freshwater (B), swimming pool water (C), seawater (D); SUN2 detected in milli-Q water (E), freshwater (F), swimming pool water (G), seawater (H) and SUN3 detected in milli-Q water (I), freshwater (J), swimming pool water (K), seawater (L).

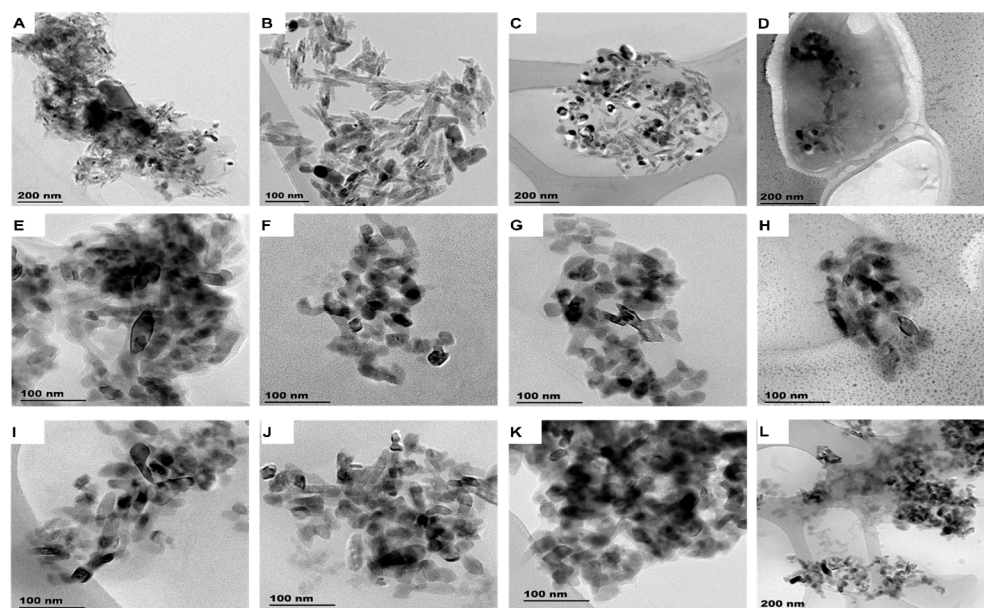

**Figure S2.** TEM images of product released-ENMs obtained under dark conditions for SUN1 detected in milli-Q water (A), freshwater (B), swimming pool water (C), seawater (D); SUN2 detected in milli-Q water (E), freshwater (F), swimming pool water (G), seawater (H) and SUN3 detected in milli-Q water (I), freshwater (J), swimming pool water (K), seawater (L).

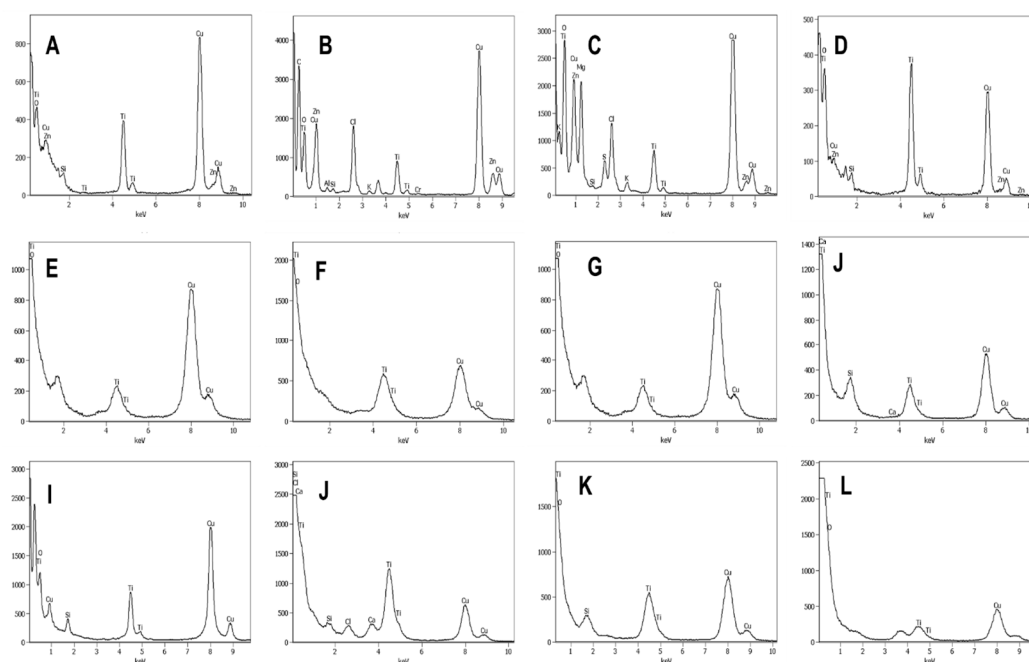

**Figure S3.** Corresponding EDX images of product released-ENMs obtained under dark conditions for SUN1 detected in milli-Q water (A), freshwater (B), swimming pool water (C), seawater (D); SUN2 detected in milli-Q water (E), freshwater (F), swimming pool water (G), seawater (H) and SUN3 detected in milli-Q water (I), freshwater (J), swimming pool water (K), seawater (L).

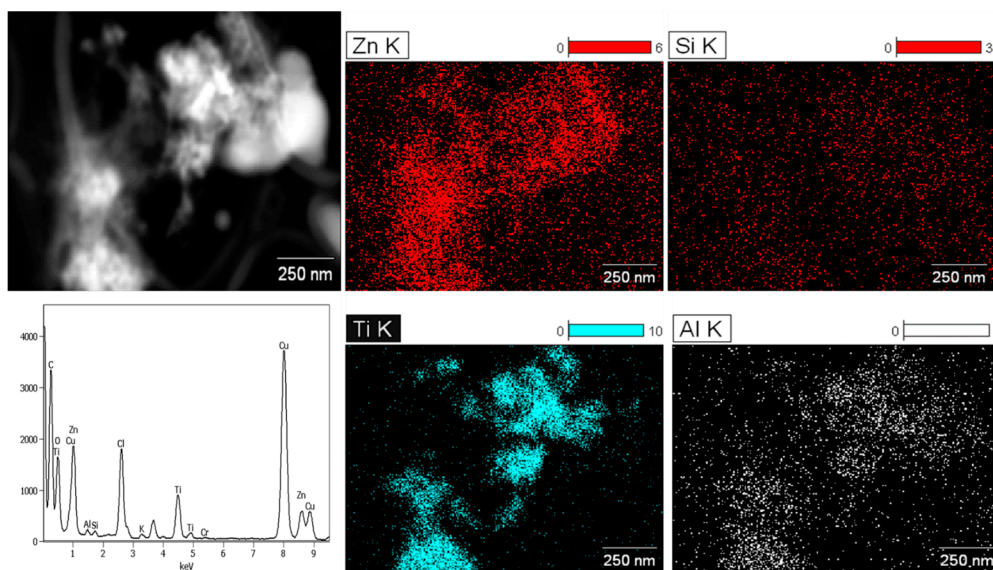

**Figure S4.** EDX elemental mapping showing adsorption and desorption of ENMs coating agents (Si and Al) on SUN1 released-ENMs.

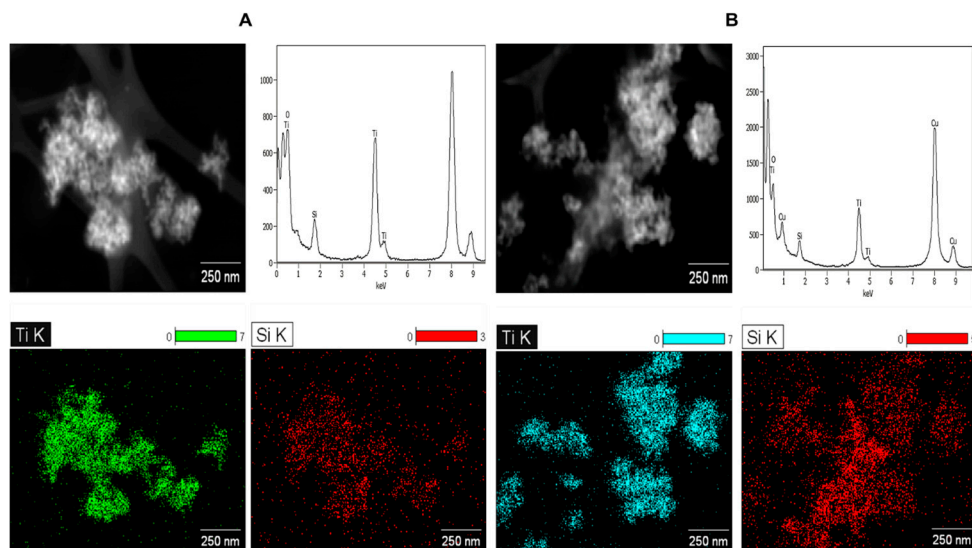

**Figure S5.** EDX elemental mapping showing adsorption and desorption of ENMs coating agents (Si) on SUN2 (A) and SUN3 (B) released-ENMs.

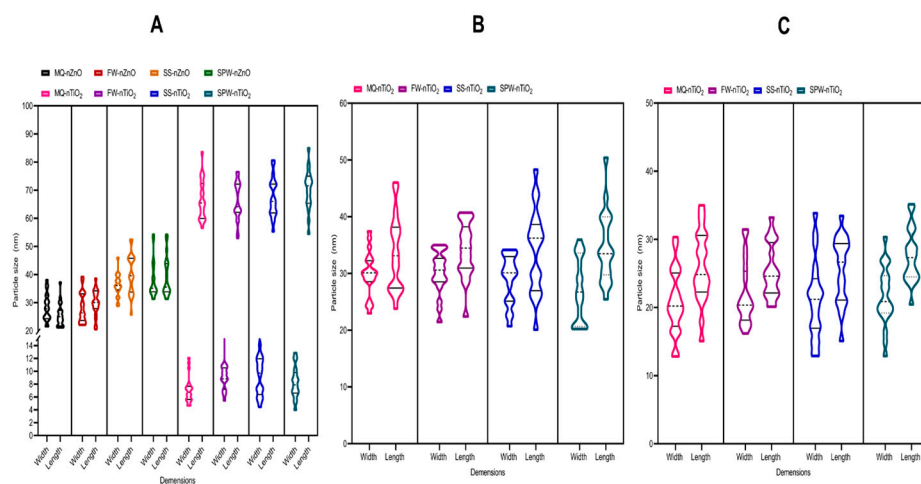

**Figure S6. A.** Violin plot showing particle distribution of SUN1(A), SUN2 (B), and SUN3 (C) released-ENMs obtained under light conditions. Upper and lower quartiles are highlighted by a solid line, while the dotted line indicates the median. The denser the violin shape the higher the number of the particle size in that region.

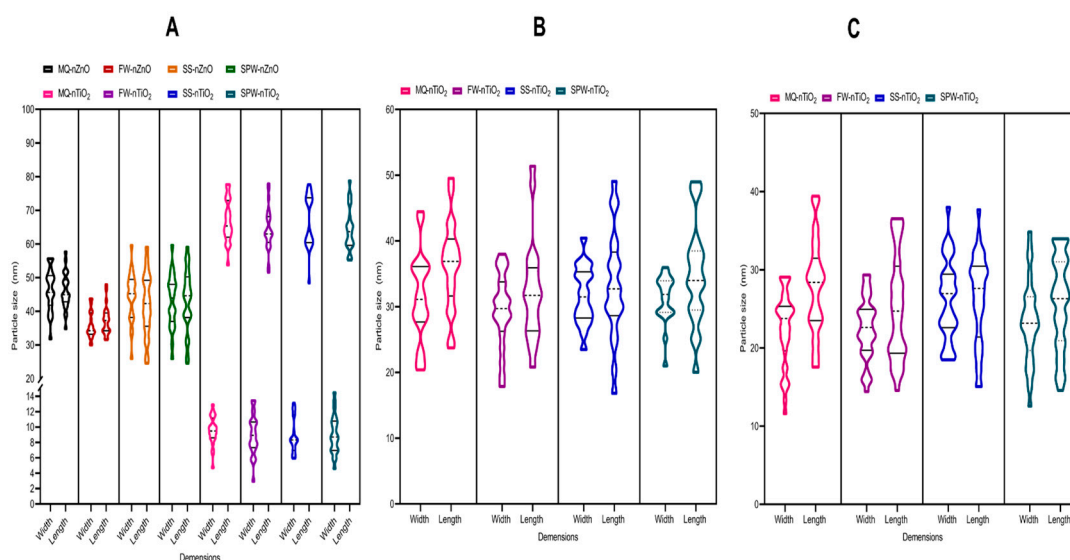

**Figure S6. B.** Violin plot showing particle distribution of SUN1(A), SUN2 (B), and SUN3 (C) released-ENMs obtained under dark conditions. Upper and lower quartiles are highlighted by a solid line, while the dotted line indicates the median. The denser the violin shape, the higher the number of particle size in that region.

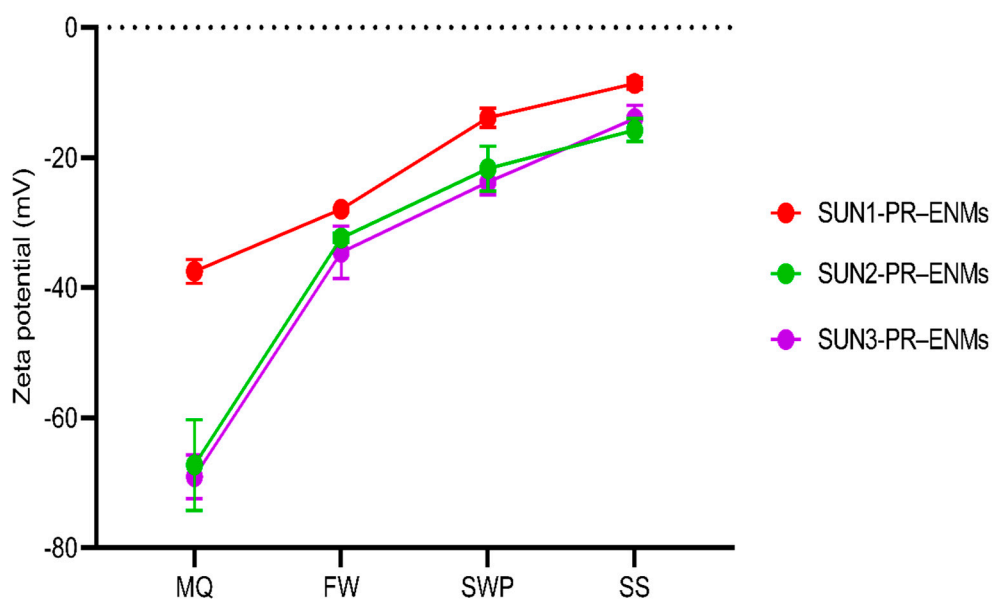

**Figure S7.** Zeta potential of SUN1–3 released-ENMs obtained under dark conditions in different release media of milli-Q water (MQ), freshwater (FW), swimming pool water (SPW), and seawater (SS).

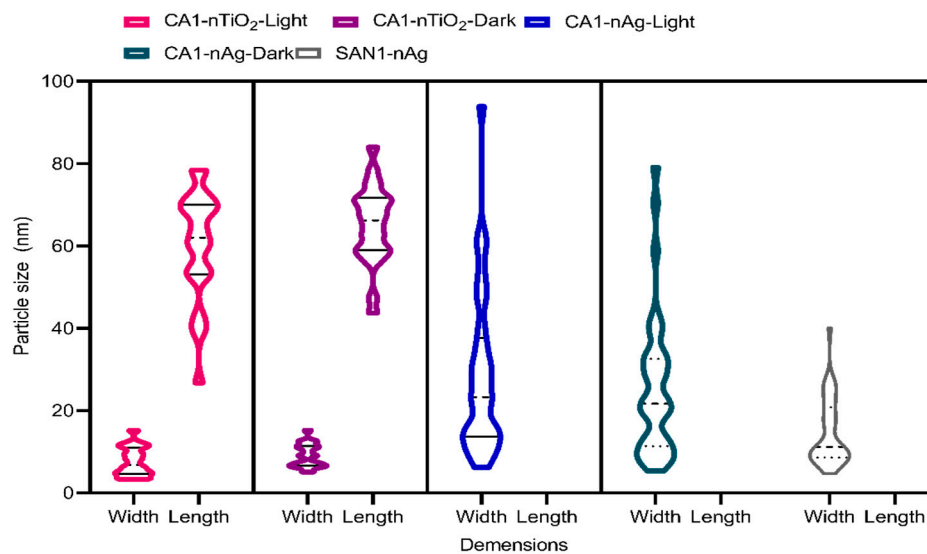

**Figure S8.** Violin plot showing particle distribution of CA1 released-ENMs (obtained under light and dark conditions) and SAN1 released-ENMs. Upper and lower quartiles are highlighted by a solid line, while the dotted line indicates the median. The denser the violin shape the higher the number of the particle size in that region.

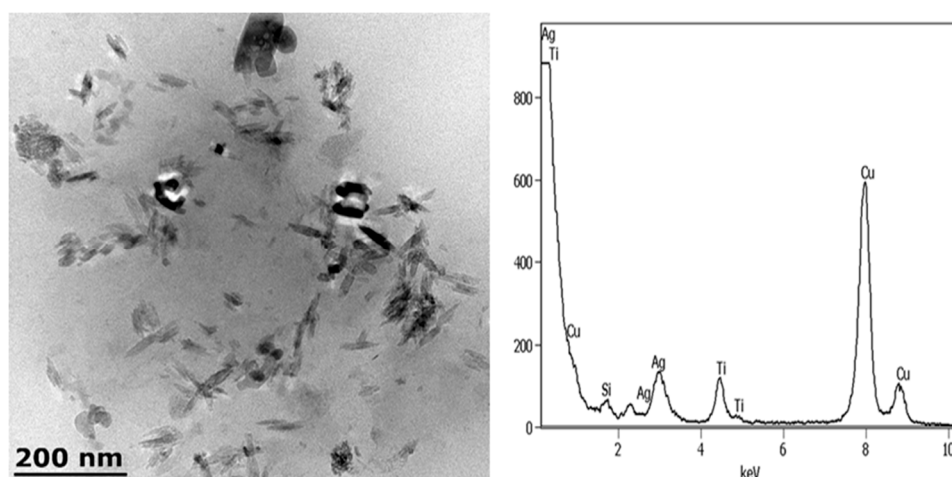

**Figure S9.** TEM-EDX image showing of CA1 product released-nAg and product released-nTiO<sub>2</sub> obtained under dark conditions.

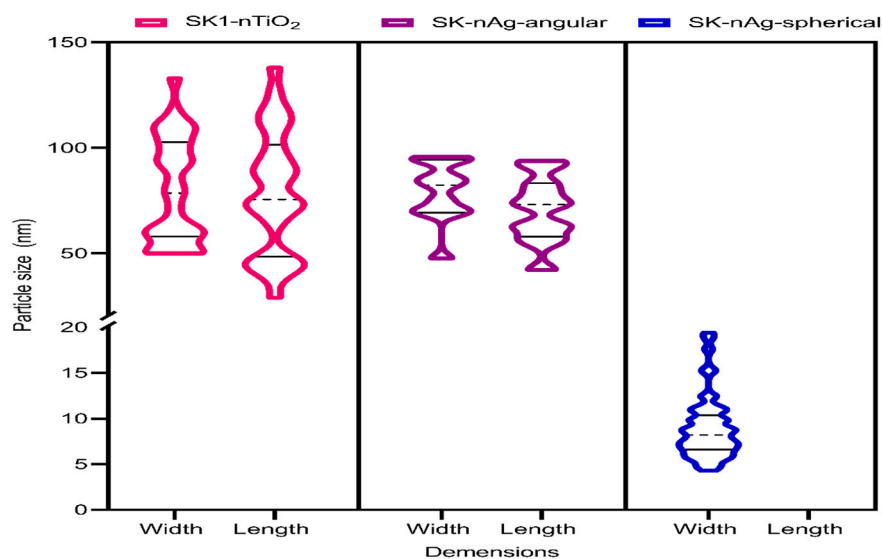

**Figure S10.** Violin plot showing particle distribution SK1 released-ENMs. Upper and lower quartiles are highlighted by a solid line, while the dotted line indicates the median. The denser the violin shape, the higher the number of particle size in that region.

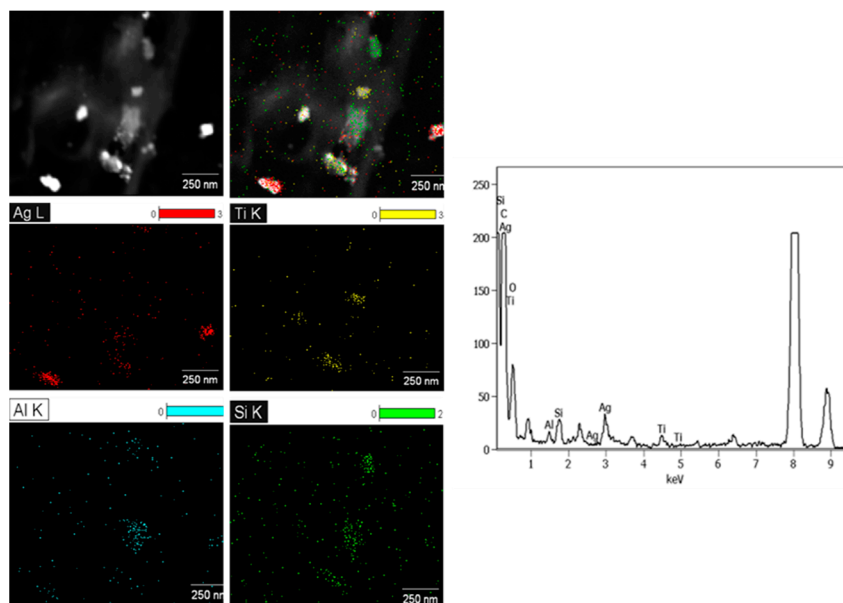

**Figure S11.** Elemental mapping of binary SK1 released-ENMs identified as product released-nTiO<sub>2</sub> (yellow) and product released-nAg (red). The images further show evidence of SK1 released-nTiO<sub>2</sub> particles partially still coated with Si and Al.

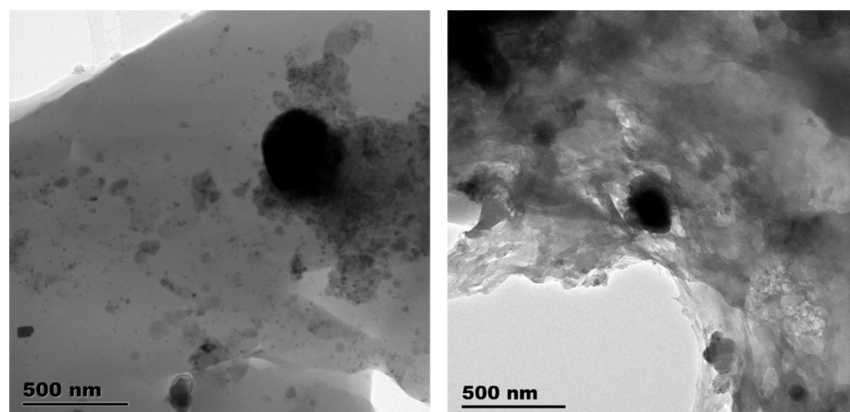

**Figure S12.** TEM images showing the thick layer introduced by washing SK1 with sodium dodecyl sulfate release media.



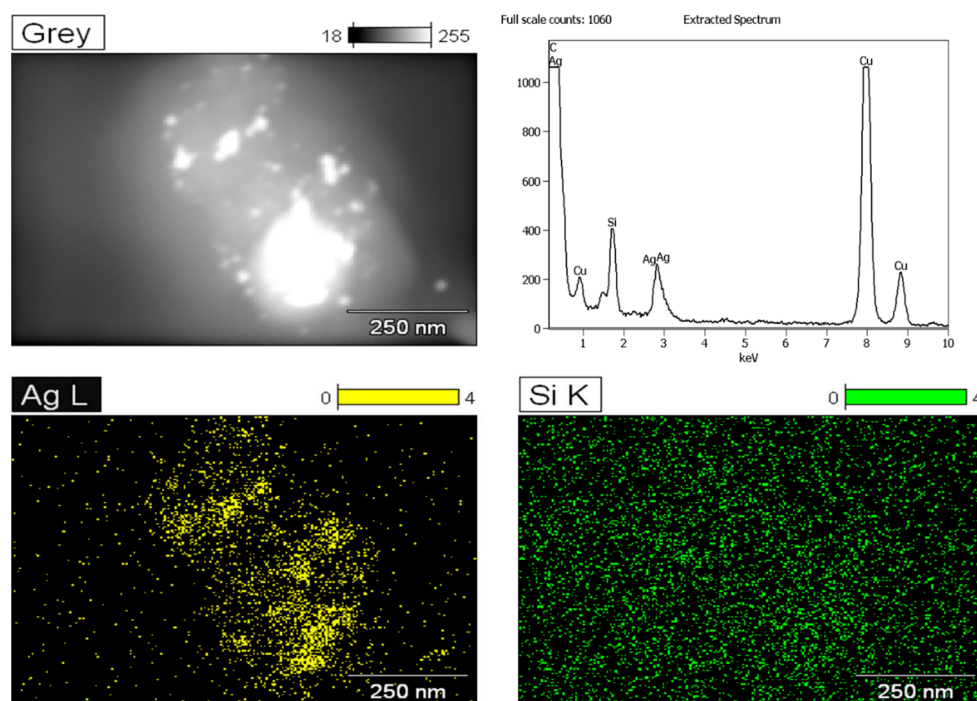

**Figure S13.** EDX elemental mapping illustrating Si desorbed from CA1 released-ENMs.

## References

1. Red Sea Salt -Ideal for mature reef and low nutrient systems Available online: <https://www.redseafish.com/red-sea-salts/red-sea-salt/> (accessed on Mar 23, 2020).
2. Anipsitakis, G.P.; Tufano, T.P.; Dionysiou, D.D. Chemical and microbial decontamination of pool water using activated potassium peroxymonosulfate. *Water Res.* **2008**, *42*, 2899–2910, doi:10.1016/j.watres.2008.03.002.
3. Virkutyte, J.; Al-Abed, S.R. Statistical evaluation of potential damage to the Al(OH)<sub>3</sub> layer on nTiO<sub>2</sub> particles in the presence of swimming pool and seawater. *J. Nanoparticle Res.* **2012**, *14*, 787, doi:10.1007/s11051-012-0787-7.
